# Supplementary material for: Variations of five eIF4E genes across cassava accessions exhibiting tolerant and susceptible responses to cassava brown streak disease
Source: PubMed Central journal article supplement (PMC5542559; doi:10.1371/journal.pone.0181998), 2017-08-03
Supplement: pone.0181998.s001.pdf [file pone.0181998.s001.pdf]

Supporting information:

**Table A. Distribution and characteristics of SNP sites in five eIF4E genes and neighboring regions in 61 cassava accessions**

| Loci*          | Total SNP | Up/Downstream (+/- 5kb) | Genes | Introns | mRNA | CDS | Synonymous | Non-synonymous |
|----------------|-----------|-------------------------|-------|---------|------|-----|------------|----------------|
| eIF(iso)4E_me1 | 986       | 835                     | 151   | 92      | 59   | 22  | 9          | 13             |
| nCBP_me2       | 666       | 499                     | 167   | 127     | 40   | 15  | 13         | 2              |
| nCBP_me1       | 858       | 637                     | 221   | 147     | 74   | 22  | 7          | 15             |
| eIF(iso)4E_me2 | 992       | 780                     | 212   | 175     | 37   | 13  | 9          | 4              |
| eIF4E_me       | 886       | 776                     | 110   | 68      | 42   | 30  | 13         | 17             |
| Total          | 4388      | 3527                    | 861   | 609     | 252  | 102 | 51         | 51             |

**Table B. Non-synonymous single nucleotide polymorphisms in five cassava eIF4E genes of 14 cassava accessions**

| Chromosome | Position | AM560 | Albert | AR37-80 | Kibandameno' | Kiroba | MCOL22 | Mkombozi | Muzege | Namikonga | Nachinyaya | TME3 | TME7 | TMS30572 | TMS60444 |
|------------|----------|-------|--------|---------|--------------|--------|--------|----------|--------|-----------|------------|------|------|----------|----------|
| Chr03      | 25396170 | G/G   | G/G    | G/G     | G/G          | G/G    | G/C    | G/G      | G/G    | G/G       | ./.        | G/G  | G/G  | G/G      | G/G      |
| Chr03      | 25396238 | G/G   | G/G    | G/G     | G/G          | G/G    | G/C    | G/G      | G/G    | G/G       | ./.        | G/G  | G/G  | G/C      | G/C      |
| Chr03      | 25396987 | A/A   | A/A    | A/A     | A/A          | A/A    | A/T    | ./.      | A/A    | A/A       | ./.        | A/A  | A/A  | ./.      | A/T      |
| Chr09      | 25948588 | T/T   | C/C    | T/C     | T/C          | C/C    | T/C    | T/C      | T/C    | T/C       | T/C        | C/C  | C/C  | T/T      | C/C      |
| Chr15      | 3318172  | C/C   | C/T    | C/T     | ./.          | C/T    | C/T    | C/C      | C/T    | C/C       | T/T        | ./.  | C/C  | C/C      | C/C      |
| Chr17      | 20187344 | A/A   | A/A    | A/A     | A/T          | T/T    | A/A    | A/A      | A/A    | A/T       | A/A        | A/A  | A/A  | A/T      | A/A      |
| Chr17      | 20187753 | T/T   | T/T    | T/T     | T/T          | T/C    | T/T    | T/T      | T/T    | T/T       | T/T        | T/T  | T/T  | T/T      | T/T      |
| Chr17      | 20188018 | A/A   | A/A    | A/A     | A/A          | A/C    | A/A    | A/A      | A/A    | A/A       | ./.        | A/A  | A/A  | A/A      | A/A      |
| Chr17      | 20188026 | C/C   | C/C    | C/C     | C/C          | C/G    | C/C    | C/C      | C/C    | C/C       | ./.        | C/C  | C/C  | C/C      | C/C      |
| Chr17      | 20189389 | C/C   | C/C    | C/C     | C/C          | C/T    | C/C    | C/C      | C/C    | C/C       | C/C        | C/C  | C/C  | C/C      | ./.      |
| Chr17      | 20189407 | T/T   | T/T    | T/T     | T/T          | T/A    | T/T    | T/T      | T/T    | T/T       | T/T        | T/T  | T/T  | T/T      | ./.      |
| Chr17      | 20189457 | T/T   | ./.    | T/T     | T/T          | T/C    | T/T    | T/T      | T/T    | T/T       | T/T        | ./.  | T/T  | T/T      | T/T      |
| Chr17      | 20189544 | T/T   | ./.    | T/T     | T/T          | T/A    | T/T    | T/A      | T/T    | T/A       | T/T        | T/A  | T/A  | A/A      | T/T      |

\*Accessions in red display tolerant responses to CBSD while accessions in white display susceptible response to CBSD. Missing data are represented by “./.”

**Table C. Association of SNPs upstream of *eIF4E\_me* gene with CBSD disease responses.**

| CHR   | BP       | SNP         | P value | Regions         | Substitutions |
|-------|----------|-------------|---------|-----------------|---------------|
| Chr17 | 20190229 | ss.94871927 | 0.004   | Intergenic      | G/A           |
| Chr17 | 20190238 | ss.94871930 | 0.007   | Intergenic      | TA/T          |
| Chr17 | 20190251 | ss.94871935 | 0.007   | Intergenic      | A/G           |
| Chr17 | 20190252 | ss.94871936 | 0.007   | Intergenic      | TC/T          |
| Chr17 | 20192085 | ss.94872078 | 0.007   | Manes.17G063200 | G/T, T187K    |

**Table D. Information on Illumina RNAseq unpaired reads of two cassava accessions and Bowtie mapping statistics<sup>1</sup>.**

| SRA accessions    | Cassava accessions | CBSV Infection | Tissues | Phenotypes  | Bases | Total reads <sup>2</sup> | %mapped to genome | Reads mapped to genes |             |             |       |       |       |
|-------------------|--------------------|----------------|---------|-------------|-------|--------------------------|-------------------|-----------------------|-------------|-------------|-------|-------|-------|
|                   |                    |                |         |             |       |                          |                   | eIF4E                 | eIF(iso)4E1 | eIF(iso)4E2 | nCBP1 | nCBP2 | Actin |
| <b>SRR1213744</b> | Albert             | Healthy        | leaf    | Susceptible | 2628M | 42768937                 | 0.8765            | 1676                  | 98          | 1041        | 351   | 4136  | 6497  |
| <b>SRR1213745</b> | Albert             | Infected       | leaf    | Susceptible | 2921M | 47596602                 | 0.886             | 2203                  | 154         | 1558        | 490   | 6171  | 8700  |
| <b>SRR1213746</b> | Kaleso             | Healthy        | leaf    | Tolerant    | 1894M | 30730846                 | 0.8634            | 1224                  | 77          | 804         | 254   | 2744  | 3927  |
| <b>SRR1213747</b> | Kaleso             | Infected       | leaf    | Tolerant    | 2416M | 47596602                 | 0.886             | 2352                  | 191         | 1536        | 422   | 2825  | 9677  |

<sup>1</sup>Raw sequencing reads were generated by Maruthi et al. in 2014 [1] and retrieved from <http://www.ncbi.nlm.nih.gov/sra>.

<sup>2</sup>Average read lengths are 51 bp.

**Table E. Differential expression analysis of five cassava eIF4E genes in healthy and CBSV infected Albert and Kaleso accessions.**

| Genes              | Cassava lines | Healthy (FPKM) | Infected (FPKM) | log2      | test_stat | p <sup>1</sup> | q <sup>2</sup> |
|--------------------|---------------|----------------|-----------------|-----------|-----------|----------------|----------------|
| <b>eIF4E</b>       | Albert        | 67.4627        | 80.5457         | 0.255717  | 0.447822  | 0.6613         | 0.998506       |
|                    | Kaleso        | 68.9774        | 87.6125         | 0.345012  | 0.596169  | 0.54455        | 0.998506       |
| <b>eIF(iso)4E1</b> | Albert        | 6.18663        | 8.75624         | 0.501157  | 0.599087  | 0.5463         | 0.998506       |
|                    | Kaleso        | 6.74423        | 11.0195         | 0.708338  | 0.878567  | 0.36865        | 0.998506       |
| <b>eIF(iso)4E2</b> | Albert        | 39.6478        | 53.6243         | 0.435647  | 0.752701  | 0.44975        | 0.998506       |
|                    | Kaleso        | 42.7417        | 53.4709         | 0.32311   | 0.560435  | 0.5804         | 0.998506       |
| <b>nCBP1</b>       | Albert        | 9.56893        | 11.9476         | 0.320294  | 0.474463  | 0.6357         | 0.998506       |
|                    | Kaleso        | 9.70205        | 10.443          | 0.106175  | 0.157073  | 0.87315        | 0.998506       |
| <b>nCBP2</b>       | Albert        | 135.035        | 181.42          | 0.426     | 0.720313  | 0.4565         | 0.998506       |
|                    | Kaleso        | 125.056        | 83.9671         | -0.574679 | -0.990581 | 0.32255        | 0.998506       |

<sup>1</sup>The uncorrected p-value of the test statistic.

<sup>2</sup>The FDR-adjusted p-value of the test statistic. FDR is set at 0.05.

**Table F. Information on 454 GS FLX Titanium RNAseq reads of six cassava accessions and Bowtie mapping statistics<sup>1</sup>.**

| SRA accessions   | Cassava accessions | Tissues    | Phenotypes  | Bases | Total reads <sup>2</sup> | %mapped to genome | Reads mapped to genes |             |             |       |       |       |
|------------------|--------------------|------------|-------------|-------|--------------------------|-------------------|-----------------------|-------------|-------------|-------|-------|-------|
|                  |                    |            |             |       |                          |                   | eIF4E                 | eIF(iso)4E1 | eIF(iso)4E2 | nCBP1 | nCBP2 | Actin |
| <b>SRR955450</b> | AR37-80            | leaf, stem | Susceptible | 88M   | 190325                   | 70.84%            | 19                    | 2           | 5           | 8     | 4     | 32    |
| <b>SRR955446</b> | AR40-6             | leaf, stem | Susceptible | 101M  | 208365                   | 64.21%            | 17                    | 2           | 15          | 7     | 0     | 68    |
| <b>SRR955445</b> | Mkombozi           | leaf, stem | Susceptible | 168M  | 346000                   | 66.89%            | 22                    | 3           | 19          | 10    | 3     | 85    |
| <b>SRR955449</b> | Kiroba             | leaf, stem | Tolerant    | 123M  | 291436                   | 60.83%            | 7                     | 2           | 6           | N/A   | 2     | 54    |
| <b>SRR955447</b> | Nachinyaya         | leaf, stem | Tolerant    | 141M  | 261139                   | 68.06%            | 5                     | 4           | 13          | 17    | 1     | 46    |
| <b>SRR955444</b> | Namikonga          | leaf, stem | Tolerant    | 99M   | 205405                   | 61.29%            | 14                    | 1           | 5           | 2     | 3     | 49    |

<sup>1</sup>Raw sequencing reads were generated by Ferguson et al in 2015 [2] and retrieved from <http://www.ncbi.nlm.nih.gov/sra>.

<sup>2</sup>Average read lengths are 500 bp.

A. eIF(iso)4E\_me1 (Locus: Manes.03G160000)

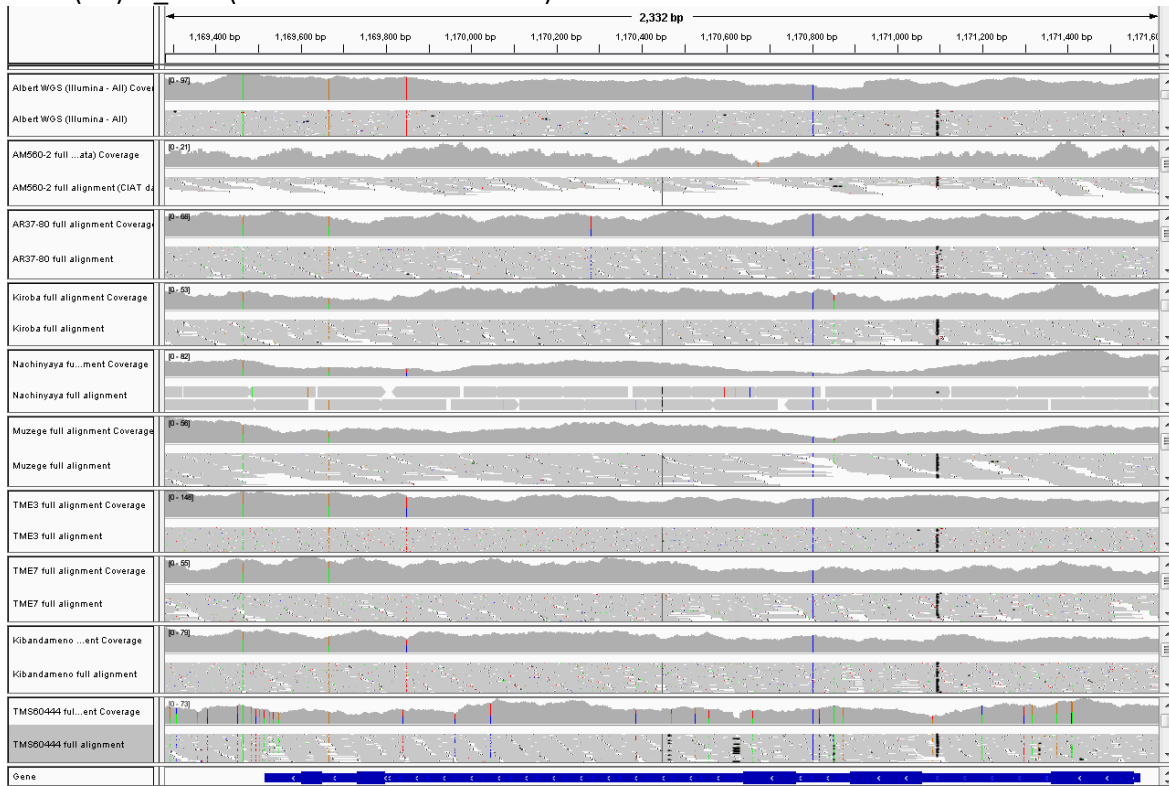

B. nCBP\_me2 (Locus: Manes.08G145200)

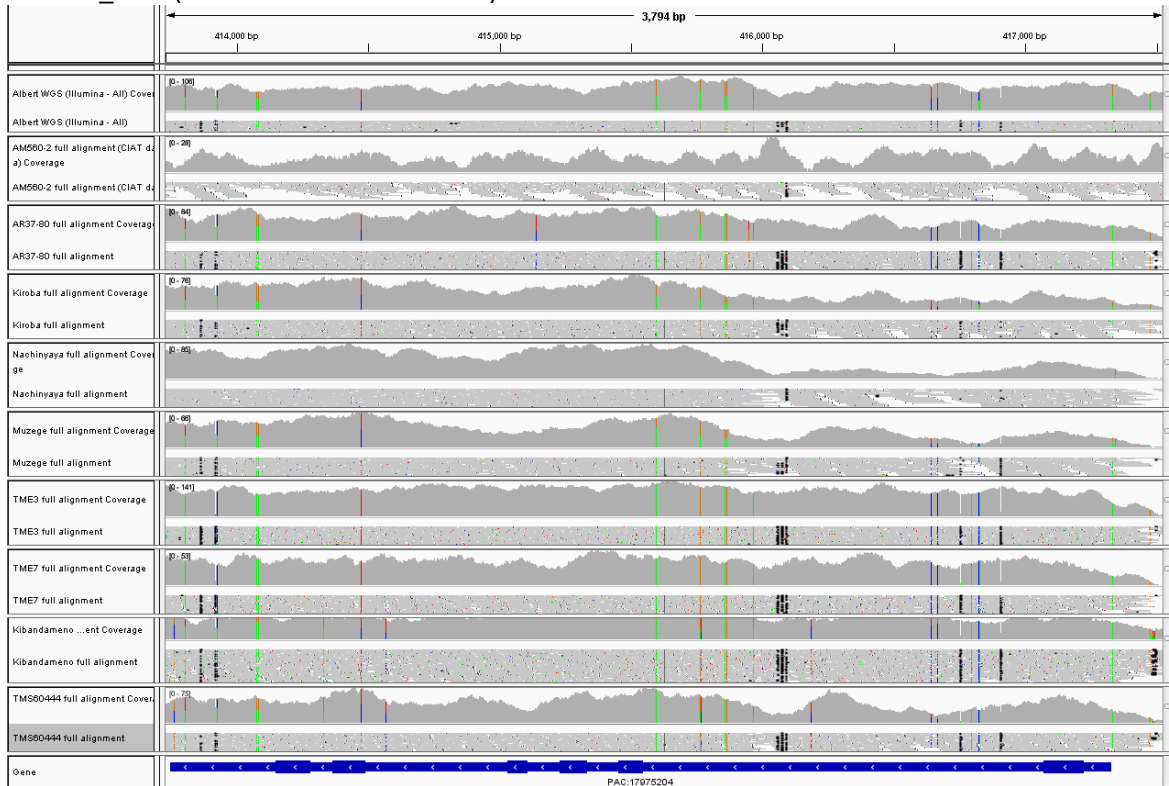

C. nCBP\_me1 (Locus: Manes.09G140300)

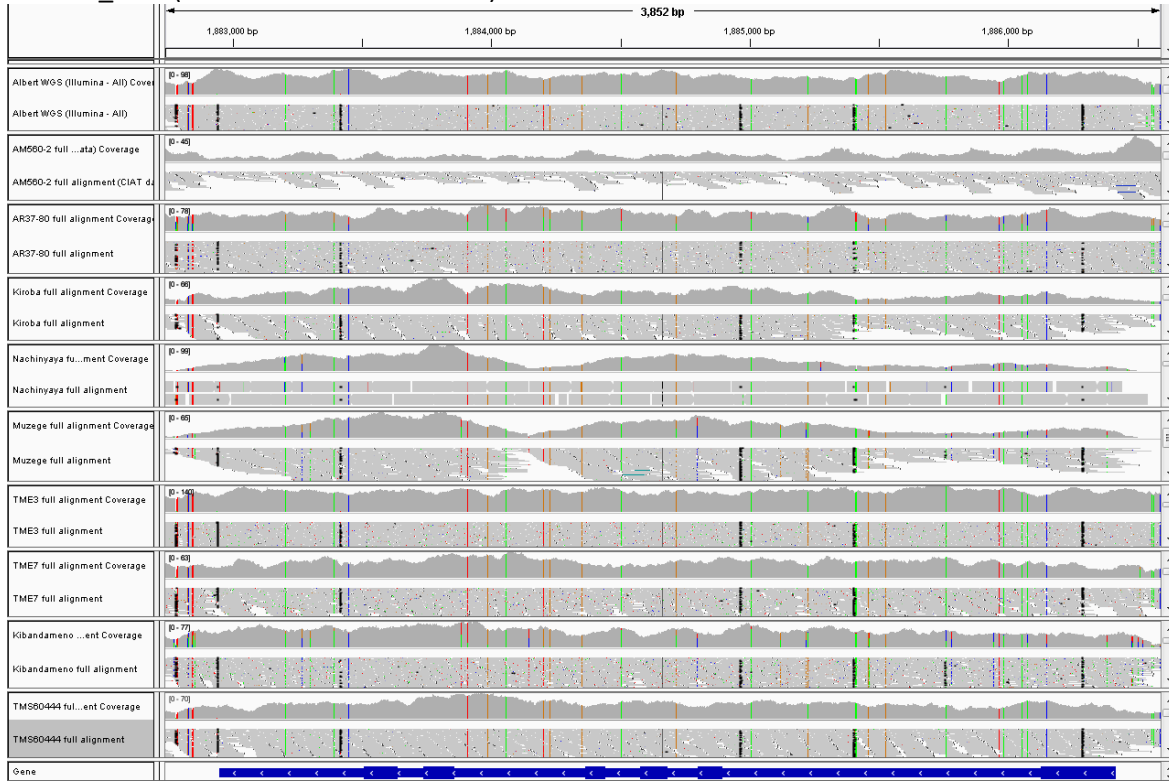

D. eIF(iso)4E\_me2 (Locus: Manes.15G044900)

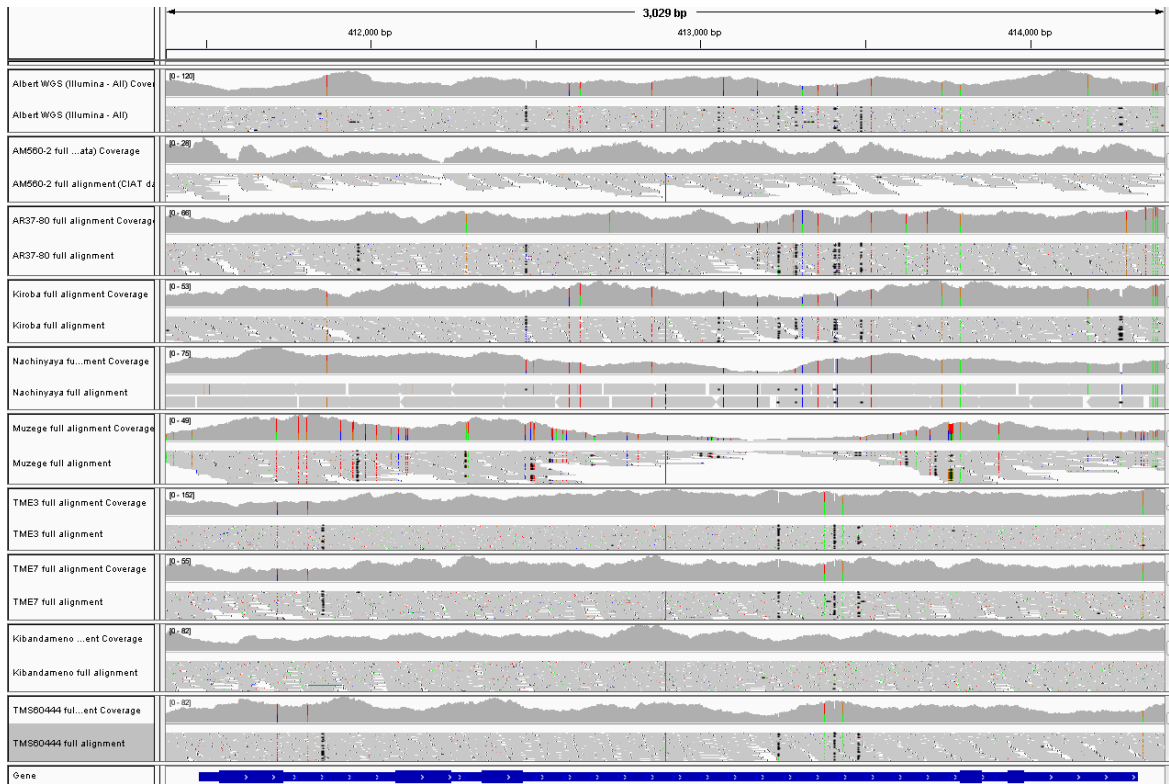

E. eIF4E\_me (Locus: Manes.17G063100)

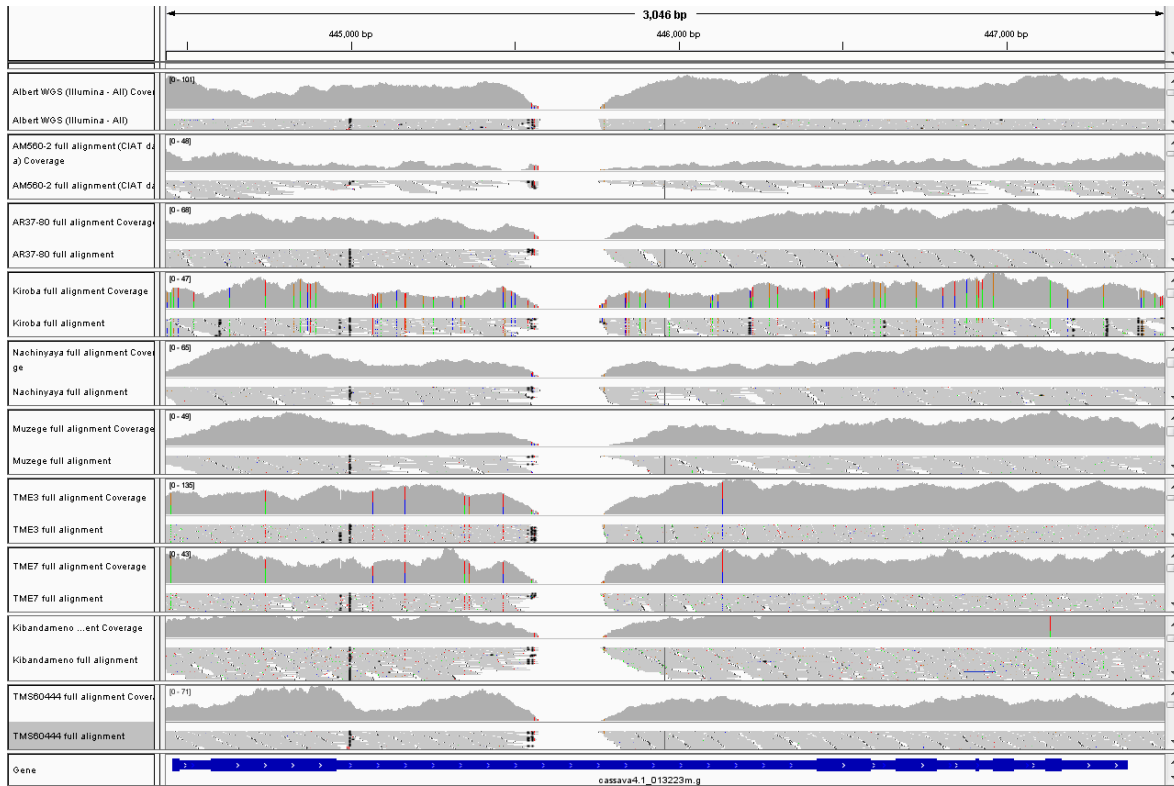

**Figure A. Distribution of nucleotide polymorphisms in five cassava eIF4E genes across 10 landraces.** High quality Illumina reads of 10 cassava genomes are anchor-aligned to the cassava genome and viewed in IGV [3]. Vertical colored lines indicate nucleotide polymorphisms. Each color represents a different nucleotide substitution. Black dots indicate deletions or missing data. Biallelic variations are clearly visible in certain genes of cassava lines.

10 20 30 40 50 60 70

Cm\_iso\_ABY56090.1 MAGEVA-----VEGAVAVAAAASEVAD-----SNPOSHKLE  
 Cs\_iso\_ABY56102.1 MAGEVA-----VEGAVAAAAALATEVAD-----SNPOAHKLE  
 eIF(iso)4E\_me1 MATETA-----TEG-SATEATATGVE-----KPLQ-HKLE  
 eIF(iso)4E\_me2 MASETA-----IEG-TATEATASGAE-----QPQQ-HKLE  
 Rc\_EEF34040.1 MATETA-----IEGTTATEIGTENPA-----PAQQ-HKLE  
 Jc\_KDP40383.1 MATETA-----IEG-TAAEAAAIVTE-----KPPS-HKLE  
 Vv\_CBI23707.3 -----MESGAAPTE-----AAKOPHRLE  
 Vv\_XP\_002285444.1 MASEAACM-----ESGAGMESGAAPTE-----AAKOPHRLE  
 Pt\_EEE89965.1 MAANEAGTE-----VTAPTTEGLVTEQPQPQ-----PQPQPQPHKLE  
 Pt\_EEF01754.1 -----PHKLE  
 Gm\_ACU23400.1 MATSE-----EVVAAAPFAA-----ALEAGLKHKLE  
 Pv\_iso\_ABU54804.1 -----VAAAP-AP-----VVEAGLKHKLE  
 Ps\_iso\_BAM28884.1 MATTEP-----LVEGSTAEVVAAP-VP-----APEVGLKHKLE  
 St\_iso\_CBJ34337.1 MATEAP-----VEATEIPPVAAAE-----VEKOPHKLE  
 St\_iso\_CCM43797.1 MATEAP-----VEATEIPPVAAAE-----VEKOPHKLE  
 eIF4E\_me MAAEETPKSTTEET-PNPNLNSNPRADDVNDDEPEEAGEIVGDE-----ESSAKKSSAVTYQPHPLE  
 Jc\_KDP21178.1 MVVEEAQKSSSTTTTGETPIPNPIKAEEDVNNDEPEEAGEIVGDE-----DSSVEKSTAVTYQPHPLE  
 Rc\_EEF42744.1 MAVVEEPQKLTIPNSSETPNRNP-NPSDVKEDEVEEAGEIVGGEG-----EEESTAKSALTYEAPHLE  
 Pt\_EEF97358.1 MDVEDPQKLATEKT-----PNPNTEDDLEEGEIVAG-----GDD-----DSSLKKSVALPYQPHPLE  
 St\_AER62155.1 MADELNKAASEEY-----KTSSVEDGG-EEGEIVGESD-----DTASFLGKQITMK-HPLE  
 Cl\_ACN51301.1 MVVEETIKATSTEDLSNTIANQNPRGRGGDEDEEELEEGEIVGDDDL-----DSSNLSAAIVHOPHPLE  
 Cl\_AEK98516.1 MVVEETIKATSTEDLSNTIANQNPRGRGGDEDEEELEEGEIVGDDDL-----DSSNLSAAIVHOPHPLE  
 Cl\_ACN51302.1 MVVEETIKATSTEDLSNTIANQNPRGRGGDEDEEELEEGEIVGDDDL-----DSSNLSAAIVHOPHPLE  
 Cm\_ABD57969.1 MVVEDSMKATSADLSNSIANQNPRGRGGDEDEEELEEGEIVGDDDL-----DSSNLSASIVHOPHPLE  
 Cm\_ABQ53636.1 MVVEDSMKATSADLSNSIANQNPRGRGGDEDEEELEEGEIVGDDDL-----DSSNLSASIVHOPHPLE  
 Cs\_ABY56085.1 MVVEDTIKATSADLSNSIANQNPRGRGGDEDEEELEEGEIVGDDDL-----DSSNLTAAIVHOPHPLE  
 Cs\_XP\_004161134.1 MVVEDTIKATSADLSNSIANQNPRGRGGDEDEEELEEGEIVGDDDL-----DSSNLTAAIVHOPHPLE  
 Ps\_AAT44121.1\_sbm1 MVVEETPKSIITDDQITNPN-----RVIEDNNLEEGEILDED-----DSSATSKFVVHOPHPLE  
 Ps\_ABG35118.1 MVVEDTFKSIITDDQITNPN-----RVIEDNNLEEGEILDED-----DSSATSKFVVHOPHPLE  
 Gm\_ACU23738.1 MVVEDAQKSAITEDQNSRVAN--DNN--DDEDL-----VRNPHPLE  
 Gm\_XP\_003546060.1 MVVEDAQKSAITEDQNSRVAN--DNN--DDEDLEEGEIPDDGDD-GASATSKPPSAIVRNPHPLE  
 Gm\_ACM45958.1 MVVEDTQKSVITEDQPSRVVS--DNNNDDDDDLEEGEIPVDDGSDGATATTKPPAALARNPHPLE  
 Pv\_ABU54812.1 -----KSTITDEQNPSRVDN--DDD-----DLEDGEILEDADD-AASAASKPPSAFLRNPHPLE  
 Pv\_ABU54817.1 -----KSTITDEQNPSRVDN--DDD-----DLEDGEILEDADD-AASAASKPPSAFLRNPHPLE  
 Vv\_XP\_002267488.1 MGDIVVEELPRSATTEDQGSTHNPN--PRPHGDDEEDLEEGEIVDDAS-----ASLKQSAATHOPHPLE  
 Hs\_NP\_001959.1 MATVPEETTP-----TPNPPTTEEEKTESNOE-----VANPEHYIKHPLQ  
 Gm\_ACU15859.1 MDFTVEKKE--SENN--ENAHPTTLDSSQLASALDSNNKEIE-----ERQAREIKAGLHPLK  
 Pv\_ABU54825.1 MEFTVEKLENNNSANNP--ENAHQS-LDSSQLASALDSNSKETETE-----ERQAREIKAGLHPLK  
 nCBP\_me2 MEITEKKDT--ENNTNNSNNAQTLLDSA--SLENIDKEAE-----ERQARDIKAGLHPLK  
 Jc\_KDP39693.1 MEITEKKET--ENN--NINAQTAVDST--PTDIIDKEAE-----ERQARDIKAGLHPLK  
 Rc\_XP\_002525418.1 MEITEKKET--EKN--NKNNTDSAS--NDLIMDKETE-----ERQAREIKAGLHPLK  
 Pt\_XP\_002319689.1 MEISEKKEP--ENN--NNISQATLDDSS--TTDIIDKESE-----ERQAREIKAGLHPLK  
 nCBP\_me1 MEITEETE--NNNY--SNNNARTASS--PDNIDKVAE-----ERQARDIKAGLHPLK  
 Vv\_XP\_002281697.1 MEITEKKEA--ESKG--LNPQSVTEAT--SFNSDKAEAD--R-ERQARDIKAGLHPLK  
 Cs\_XP\_004141135.1 MEFVGENRDFDSANDNN-KPNSAQPLLDSSFPQSLADDTNAKEAEE--LSERIARDIKDGLHPLK  
 At\_AAC17220.1 MEVLDRRDD--EIRD--SGNMDSIK--SHYVTDVSE-----ERRSREIKDGLHPLR  
 Consensus -----H-L-

80 90 100 110 120 130 140

Cm\_iso\_ABY56090.1 RKWTFWFDN-QSRPKQGAAGWTSRLRKVYTFETVEEFWCLYDQLEKPSKLPANADFHLFKAGVEPKWEDPE  
 Cs\_iso\_ABY56102.1 RKWTFWFDN-QSRPKQGAAGWTSRLRKVYTFETVEEFWCLYDQLEKPSKLPANADFHLFKAGVEPKWEDPE  
 eIF(iso)4E\_me1 RKWTFWFDN-QSKPKQGAAGWTSRLKTYTFETVEEFWCLYDQLEKPSKLPANADFHLFKAGVEPKWEDPE  
 eIF(iso)4E\_me2 RKWTFWFDN-QSKPKQGAAGWTSRLKTYTFETVEEFWCLYDQLEKPSKLPANADFHLFKAGVEPKWEDPE  
 Rc\_EEF34040.1 RKWTFWFDN-QSKPKQGAAGWTSRLRKVYTFETVEEFWCLYDQLEKPSKLPANADFHLFKAGVEPKWEDPE  
 Jc\_KDP40383.1 RKWTFWFDN-QSKPKQGAAGWTSRLKTYTFETVEEFWCLYDQLEKPSKLPANADFHLFKAGVEPKWEDPE  
 Vv\_CBI23707.3 RKWTFWFDN-QSKPKQGAAGWTSRLRKVYTFETVEEFWCLYDQLEKPSKLPANADFHLFKAGVEPKWEDPE  
 Vv\_XP\_002285444.1 RKWTFWFDN-QSKPKQGAAGWTSRLRKVYTFETVEEFWCLYDQLEKPSKLPANADFHLFKAGVEPKWEDPE  
 Pt\_EEE89965.1 RKWTFWFDN-QSK--CGAAGWTCRLRKVYSFDTVEEFWCLYEQVLEKPSKLPANADFHLFKAGVEPKWEDPE  
 Pt\_EEF01754.1 RKWTFWFDN-QSKPNQGAAGWTSRLKIYSFDTVEEFWCLYEQVLEKPSKLPANADFHLFRAGIEPKWEDPE  
 Gm\_ACU23400.1 RKWTFWCDN-QSKPKQGAAGWTSRLRKVYTFETVEEFWCLYDQVLEKPSKLPANADFHLFKAGVEPKWEDPE  
 Pv\_iso\_ABU54804.1 RKWTFWCDN-QSKPKQGAAGWTSRLRKVYTFETVEEFWCLYDQLEKPSKLPANADFHLFKAGVEPKWEDPE  
 Ps\_iso\_BAM28884.1 RKWTFWFDN-QSKPKQGAAGWTTLRKVSFDTVEEFWCLHDQLEKPSKLPANADFHLFKAGVEPKWEDPE  
 St\_iso\_CBJ34337.1 RKWTFWFDN-QSKPKQGAAGWTSRLKTYTFETVEEFWSLYDQLEKPSKLPANADFHLFKAGVEPKWEDPE  
 St\_iso\_CCM43797.1 RKWTFWFDN-QSKPKQGAAGWNSLRKTYTFETVEEFWSLYDQLEKPSKLPANADFHLFKAGVEPKWEDPE







**Figure B. Alignment of cassava eIF4E proteins with representative plant and human eIF4E proteins.** Proteins were aligned with ClustalX 2.0 [4] and manually inspected and adjusted. Shading of similar amino acids and display were performed with BioEdit 7.09 [5]. Amino acids conserved in all eIF4E proteins are noted in the consensus line. Eight conserved tryptophan (W) amino acids are indicated with arrows and two involved in cap-binding are indicated in red arrows. Positions of eIF4E proteins where amino acid substitutions resulted in recessive resistance to potyviruses in nature or experimentally [6,7] are indicated by red six-point stars. Protein sequences of additional eIF4E family proteins were retrieved from NCBI. Protein sources are identified with two letters representing the initials of genus and species, followed by NCBI accession number. At, *Arabidopsis thaliana*; Ca: *Capsicum annum*; Cl, *Citrullus lanatus*; Cm, *Cucumis melo*; Cs, *Cucumis sativus*; Gm, *Glycine max*; Hs, *Homo sapiens*; Jc, *Jatropha curcas*; Ps, *Pisum sativum*; Pt, *Populus trichocarpal*; Pv, *Phaseolus vulgaris*; Rc, *Ricinus communis* ; St, *Solanum tuberosum*; and Vv, *Vitis vinifera*.

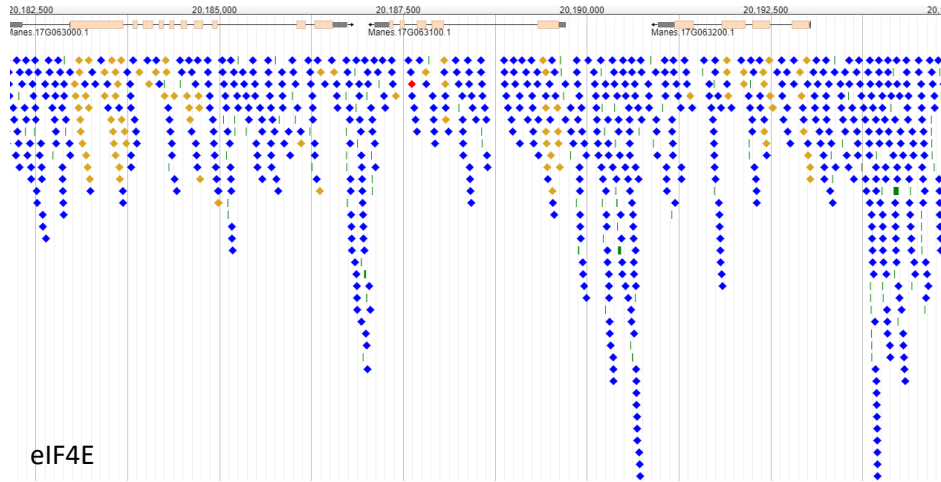

eIF4E

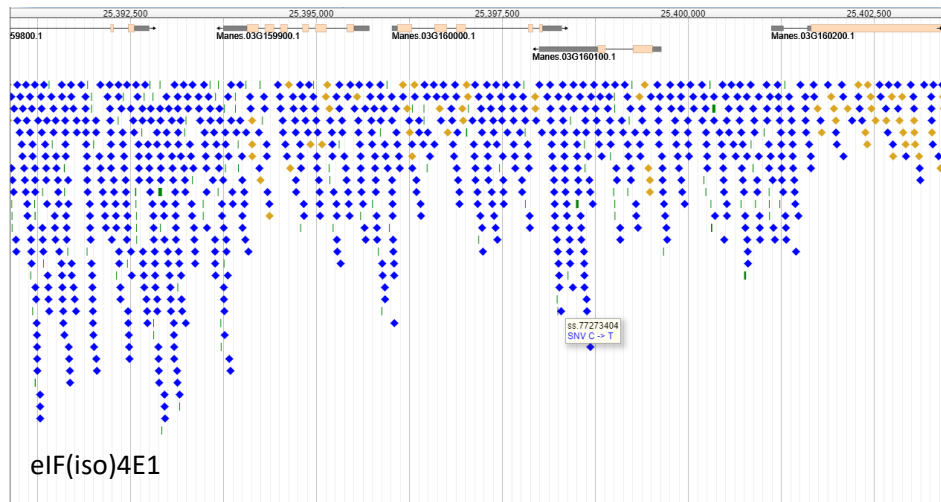

eIF(iso)4E1

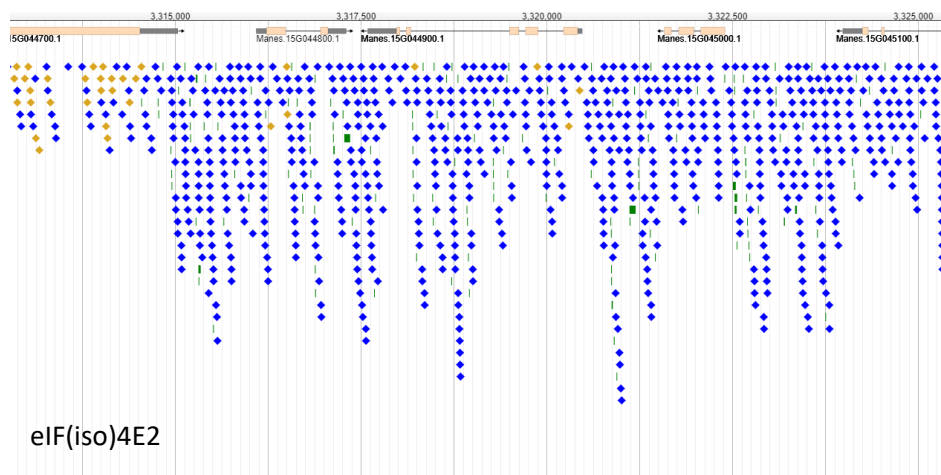

eIF(iso)4E2

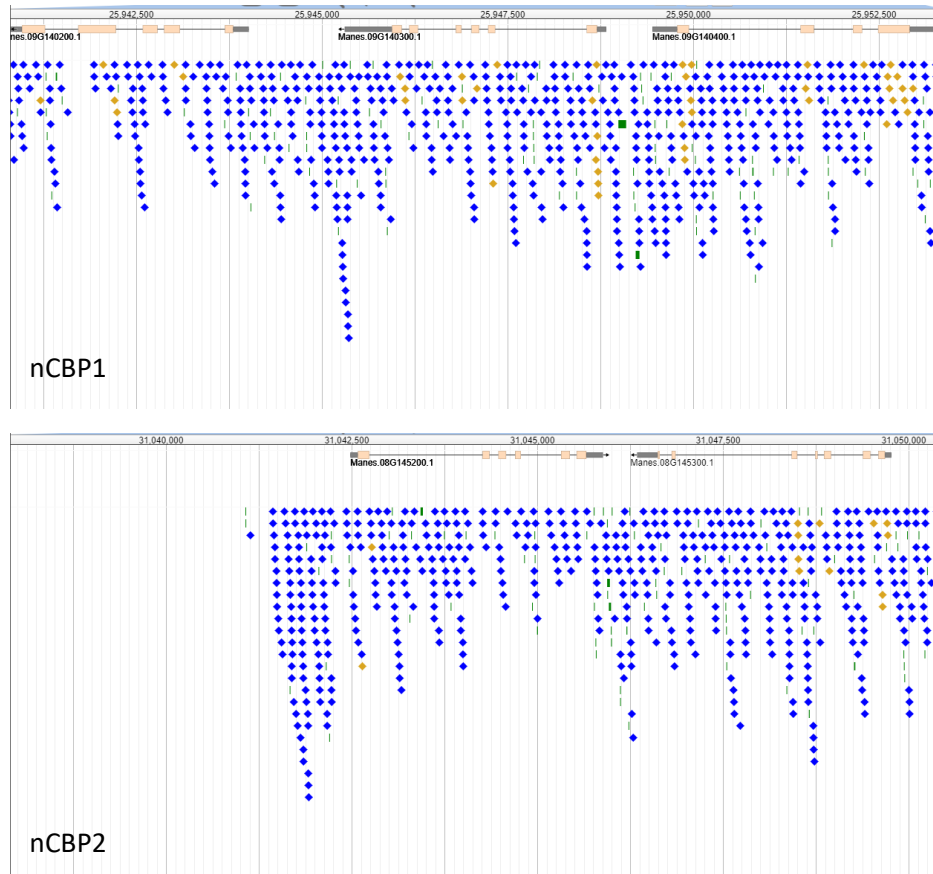

**Figure C. Single nucleotide polymorphisms (SNPs) in the five cassava eIF4E genes and the upstream and downstream 5 kb regions.** Data were obtained from combined SNPs and indels from 61 cassava accessions curated at Phytozome ([phytozome.jgi.doe.gov](http://phytozome.jgi.doe.gov)). Images of SNPs were rendered in the Genome Browser implemented at the same site. Blue diamonds: synonymous nucleotide substitutions in coding regions or substitutions in non-coding regions; yellow diamonds: non-synonymous substitutions in coding regions; red diamonds: missense substitutions; vertical green lines: indels. Only a 2kb region upstream of nCBP2 is available from the genomic sequence.

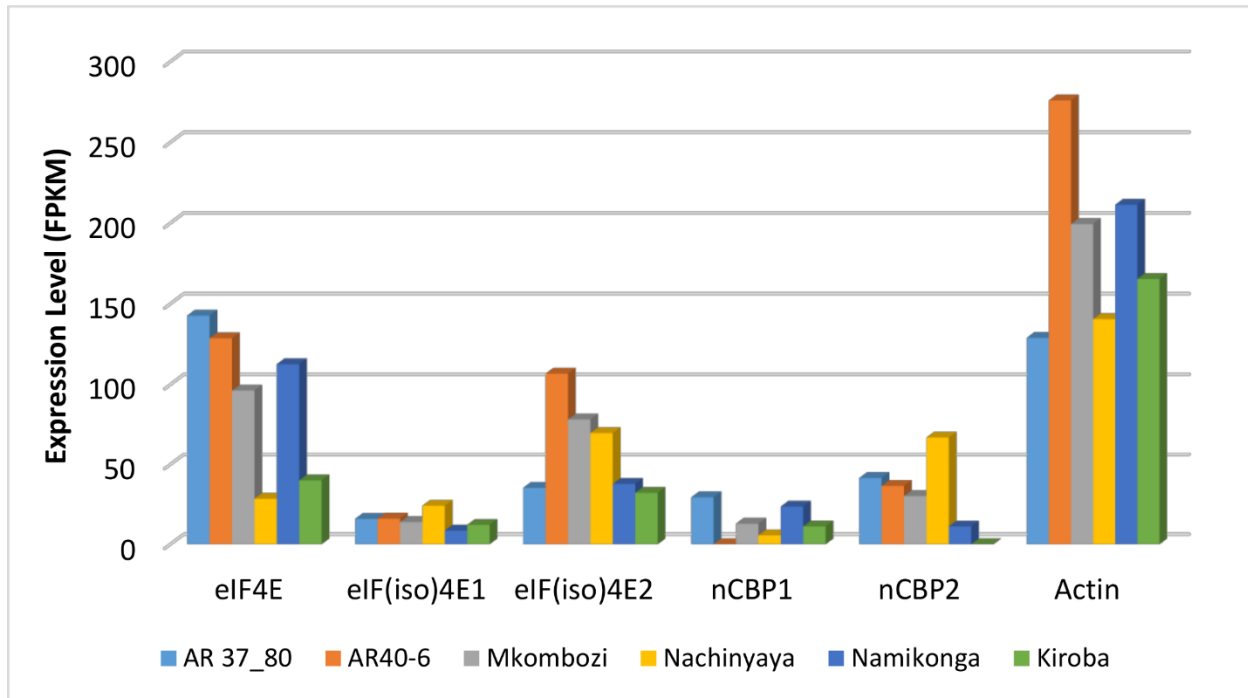

**Figure D. Expression levels of five eIF4E genes in CBSD-susceptible and -tolerant lines.** RNAseq long reads (0.5 kb) specific to each gene from each of the lines generated by the Life Sciences 454 sequencing were counted and normalized to total mapped reads from each sample to generate the FPKM counts. AR37-80, AR40-6, and Mkombozi were susceptible to CBSD while Kiroba, Nachinyaya, and Namikonga were tolerant to CBSD. Raw data were retrieved from NCBI SRA (accessions SRR955444-SRR955447, SRR955449, SRR955450, SRR955453, and SRR955456) [2].

## References

1. Maruthi MN, Bouvaine S, Tufan HA, Mohammed IU, Hillocks RJ (2014) Transcriptional Response of Virus-Infected Cassava and Identification of Putative Sources of Resistance for Cassava Brown Streak Disease. *Plos One* 9.
2. Ferguson M, Koga T, Johnson D, Koga K, Hirsch G, et al. (2015) Identification of genes that have undergone adaptive evolution in cassava (*Manihot esculenta*) and that may confer resistance to cassava brown streak disease. *African Journal of Biotechnology* 14: 96-107.
3. Thorvaldsdottir H, Robinson JT, Mesirov JP (2013) Integrative Genomics Viewer (IGV): high-performance genomics data visualization and exploration. *Briefings in Bioinformatics* 14: 178-192.
4. Larkin MA, Blackshields G, Brown NP, Chenna R, McGettigan PA, et al. (2007) Clustal W and clustal X version 2.0. *Bioinformatics* 23: 2947-2948.
5. Hall TA. BioEdit: a user-friendly biological sequence alignment editor and analysis program for Windows 95/98/NT; 1999. [London]: Information Retrieval Ltd., c1979-c2000. pp. 95-98.
6. Ashby JA, Stevenson CEM, Jarvis GE, Lawson DM, Maule AJ (2011) Structure-Based Mutational Analysis of eIF4E in Relation to sbm1 Resistance to Pea Seed-Borne Mosaic Virus in Pea. *Plos One* 6.
7. Truniger V, Aranda MA (2009) Recessive Resistance to Plant Viruses. *Advances in Virus Research*, Vol 75 75: 119-+.
